- 1 **Title:** The neurodevelopmental genes *alan shepard* and *Neuroglian* contribute to female mate
- 2 preference in African *Drosophila melanogaster*

3 **Abstract:**

4 Mate choice is a key trait that determines fitness for most sexually reproducing organisms, with  
5 females often being the choosy sex. Female preference often results in strong selection on male  
6 traits that can drive rapid divergence of traits and preferences between lineages, leading to  
7 reproductive isolation. Despite this fundamental property of female mate choice, very few loci  
8 have been identified that contribute to mate choice and reproductive isolation. We used a  
9 combination of population genetics, quantitative complementation tests, and behavioral assays to  
10 demonstrate that *alan shepard* and *Neuroglian* contribute to female mate choice, and could  
11 contribute to partial reproductive isolation between populations of *Drosophila melanogaster*.  
12 Our study is among the first to identify genes that contribute to female mate preference in this  
13 historically important system, where female preference is an active premating barrier to  
14 reproduction. The identification of loci that are primarily known for their roles in  
15 neurodevelopment provides intriguing questions of how female mate preference evolves in  
16 populations via changes in sensory system and higher learning brain centers.

17

18

19

## 20 **Introduction**

21           For sexually reproducing organisms mate choice is critical to balance maximizing fitness  
22 with avoiding costly heterospecific mating events (Mendelson and Shaw, 2012; Gray, 2022).  
23 Strong selection on male courtship traits and female preferences can drive rapid divergence  
24 between closely related lineages (Fisher, 1958; Andersson, 2019), providing a link between  
25 sexual selection and the evolution of reproductive isolation. A large body of work has focused on  
26 documenting and describing female preference and identifying genes controlling male courtship  
27 traits (Chenoweth and Blows, 2006; Yamamoto and Koganezawa, 2013; Neelon et al., 2019;  
28 Munson et al., 2020). However, there have been fewer studies that have identified specific genes  
29 that contribute to female mate preference, with most instead focusing on quantitative trait loci  
30 (Bay et al., 2017; Svensson et al., 2017; Blankers et al., 2019; Xu and Shaw, 2019; Chowdhury  
31 et al., 2020) and some identifying specific genes (Chowdhury et al., 2020). Identifying and  
32 characterizing loci contributing to female preference is a critical first step to understand how  
33 courtship signal detection, signal processing, and higher brain functions (i.e. learning and  
34 memory) contribute to sexual selection and female mate preference evolution.

35           One challenge in identifying the genetic basis of female choice lies in the complexity of  
36 preference-based behaviors (Andersson, 2019). During mate choice females are receiving many,  
37 potentially multimodal, signals that then require processing before a decision to accept or reject a  
38 mate is made (Gray, 2022; Munson et al., 2020). Progress has been made to understand male  
39 courtship and how female preference exerts divergent selection between populations (Xu and  
40 Shaw 2019a; Xu and Shaw 2021), yet even in systems where male courtship traits, and  
41 presumably male signals, are well understood, identifying female loci can be difficult (Xu and  
42 Shaw 2019b). The complexity of female preference implies that this trait is polygenic, but it is

43 unclear how many loci we would expect to contribute to this trait. Specifically, it remains  
44 unclear whether multiple loci interact in an emergent fashion, contributing to female preference  
45 as a whole, or if individual loci contribute to a specific facet (perception of a specific signal/cue)  
46 of female preference (Boake et al., 2002; Chenoweth and Blows, 2006). Additionally, while  
47 premating isolation evolves rapidly and is often thought to evolve before other barriers to  
48 reproduction (Coyne and Orr, 1989; Turissini et al., 2018), it can be difficult to determine if the  
49 behaviors that currently act as a mating barrier contributed to the speciation event or evolved  
50 after species divergence (Coyne and Orr, 2004; Safran et al., 2013; Kopp et al., 2018). Focusing  
51 on populations that vary in the degree of mating isolation can overcome some of these challenges  
52 and can be used as a model to understand the early stages of divergence and identify the loci that  
53 contribute to speciation and reproductive isolation.

54 *Drosophila melanogaster* originated in Southern Africa but is now a cosmopolitan  
55 species with a worldwide distribution. This broad range has resulted in structured and cryptic  
56 populations, even within Africa (Coughlan et al 2021), and strong premating isolation between  
57 some specific populations (Wu et al., 1995). For example, females from strains collected in  
58 Southern Africa strongly reject males from strains that are collected from non-African localities  
59 in both choice and no-choice mating experiments (Wu et al., 1995; Hollocher et al., 1997;  
60 Coughlan et al., 2021). These strong premating isolation behaviors are also observed in other  
61 parts of the *D. melanogaster* range including the Southeast United States and the Caribbean  
62 (Yukilevich and True, 2008). These mating preferences and behaviors that occur outside of  
63 Africa are potentially a product of African ancestry in these populations and admixture with non-  
64 African populations (Kao et al 2015; Bergland et al 2016). Combined, these observations of

65 strong and variable female preference and population structure provide an ideal system to  
66 explore the evolution of female mate preference.

67 In this study, we leverage these *D. melanogaster* populations by combining population  
68 genomics and behavioral assays to identify genes that contribute to female mate preference and  
69 partial reproductive isolation. First, we use previously published genomic data from Kao et al.  
70 (2015) to identify loci that show a clinal pattern of allele frequency in an admixed secondary  
71 contact zone, suggesting a role in reproductive isolation (Harrison and Larson, 2014). We  
72 compare these candidates to outlier loci from other studies allowing us to narrow our list and  
73 focus on two loci, *alan Shephard* (*shep*) and *Neuroglian* (*Nrg*). We then examine patterns of  
74 differentiation in these loci between African and non-African genomes and further provide  
75 genetic evidence that these two loci contribute to African female mate preference using  
76 quantitative complementation tests.

77

## 78 **Methods**

### 79 *Genomic cline analysis*

80 To understand how alleles potentially involved in reproductive isolation are structured we  
81 compared allele frequencies across the Southeastern United States and Caribbean using  
82 previously published data (Kao et al 2015). We focused on these populations because this clinal  
83 structure allowed us to make explicit expectations for a gene that contributes to reproductive  
84 isolation compared to the rest of the genome (Harrison and Larson 2014). Specifically, because  
85 previous studies have demonstrated a correlation between latitude and African ancestry, with  
86 more African ancestry in southern populations, we predict that genes involved in behavioral  
87 isolation will have a steeper slope (ie larger regression coefficient) compared to the rest of the

88 genome. Using the genotype matrix (genotype calls for all variable positions they identified)  
89 from Kao et al. (2015), we fit linear regression models between SNP allele frequency and  
90 latitude for the populations.

91 GO Enrichment Analysis: We retained the top 1% outliers for use in a gene ontology enrichment  
92 analysis. The list of genes used for the enrichment analysis are found in Supplemental Table 1.  
93 This list included genes that contained outlier SNPs. SNPs that were not within the known  
94 boundaries of a gene were not included in this analysis. That is, we did not assign SNPs to the  
95 nearest gene. We used the web application FlyEnrichr (Chen et al. 2016; Kuleshov et al. 2016),  
96 to look for enrichment in “biological processes”. These biological processes are defined by  
97 Flybase (The Gene Ontology Consortium 2017) and FlyEnrichr uses definitions made in the  
98 2018 version of Flybase.

99 Comparison to other datasets: We compared our list of outlier genes to two other datasets that  
100 looked for differences in behavior between African and non-African flies using either DNA  
101 sequence data or RNAseq transcriptomic data. In the first comparison we compared our set of  
102 outliers to Coughlan et al. (2021). In this study the authors compared allele frequency between  
103 strains that showed strong female choice and strains that did not show strong choice and  
104 identified outlier loci using the PBE test statistic. In the second comparison we compared our list  
105 of outliers to Bailey et al. (2011) who looked at transcriptomic data in female brains after they  
106 interacted with “preferred” and “non-preferred” males in both African and non-African strains.

107

#### 108 *Choice of candidate loci*

109 After calculating regression coefficients for each SNP, we found that two genes previously  
110 identified as important for female behavior *alan shepard* (*shep*; Chen et al., 2014) and

111 *Neuroglian* (*Nrg*; Carhan et al., 2005) were genomic outliers (See Results). These genes were  
112 outliers in at least one of the additional data sets we compared our lists with (see Results) and  
113 appeared as key loci contributing to significant GO terms in the enrichment analysis (See  
114 Results). Previous data for these genes demonstrated that null mutant females rejected were  
115 mating deficient, and we used these mutants to test for a specific role in African female behavior.  
116

### 117 *Population genetics of shep and Nrg across Drosophila populations*

118 Several studies have examined the population genetics of *Drosophila* populations from  
119 worldwide distributions (Lack et al. 2016; Kapopoulou et al. 2018; Sprengelmeyer et al. 2020),  
120 but our focus was to specifically look at variation in *shep* and *Nrg*. The SNPs identified in Kao et  
121 al (2015), the source of our cline analysis, likely represent a subset of the total variation observed  
122 in these two loci, since they focused on SNPs that they could define as coming from either the  
123 African or European source population. To understand the variation in these alleles and  
124 population differentiation we used the PopFly application (Hervas et al. 2017) to provide  
125 summary statistics for nucleotide diversity ( $\pi$ ) and differentiation ( $F_{st}$ ) for the two populations  
126 with the largest number of sequence strains, Raleigh (RAL) and Zimbabwe (ZI) (Lack et al.  
127 2016). We also exported FASTA sequences from PopFly to examine differentiation using  
128 principal components analysis. This allowed to visualize and estimate the variation of  
129 alleles/haplotypes within and between populations.

130

### 131 *Quantitative complementation test*

132 To determine if *Nrg* and *shep* alleles contribute to the female mate preference of African strains,  
133 we used a quantitative complementation test combined with a binary mate choice assay

134 (Supplemental Figure 1). Quantitative complementation tests have previously been used for no-  
135 choice tests (Chowdhury et al., 2020) and binary choice tests (Comeault et al., 2017). In a typical  
136 complementation test, the starting point is two parental strains that have divergent phenotypes for  
137 a continuous trait and are often the minimum and maximum trait values in a population  
138 (reviewed in Mackay 2001). The trait of interest may be polygenic and hybrids have an  
139 intermediate phenotype. A third strain is used that carries a genetic deficiency, a large deletion,  
140 for a gene that is suspected to contribute to the trait of interest. The deficiency may contain many  
141 genes, or just the gene of interest. In *Drosophila* these deficiencies are “balanced” by a  
142 chromosome, known as a balancer chromosome, that has several complex inversions that  
143 prevents recombination with the homologous chromosome (Muller 1918; Miller et al. 2019).  
144 Balancer chromosomes also carry a dominant visible mutation to track the presence/absence of  
145 the balancer chromosome. When both wild-type parental strains are crossed independently to the  
146 deficiency strain (that also carries the balancer chromosome) four genotypes are produced and  
147 can be phenotyped (Supplemental Figure 1). Two of the genotypes are heterozygous at the gene  
148 of interest. They carry either parental allele and the allele from the balancer chromosome. The  
149 other two genotypes are hemizygous. They only carry one the the parental alleles. The  
150 homologous chromosome either lacks the gene of interest or has a non-functional allele. In  
151 *Drosophila* balancer chromosomes have a marker with a dominant visible phenotype. This  
152 causes the heterozygote individuals, but not hemizygote individuals, to have a phenotype that  
153 could affect the trait of interest and must be taken into account during analysis (Turner et al.,  
154 2011). Additional details about complementation tests using preference behavior and  
155 considerations when using quantitative complementation tests are included in Supplemental  
156 Information.



157           Using a binary choice test, we introduced a single female of a given genotype (one of the  
158 four genotypes produced from the complementation tests crosses) to two males from  
159 representative strains: Z53 representing an African male and DGRP882 representing a non-  
160 African. Trios were observed for 60 minutes or until copulation occurred. When copulation  
161 occurred between a pair of individuals, the non-copulating male was removed and the strain  
162 identity was determined (see behavioral assay conditions, below). After the pair was finished  
163 copulating we also examined the successful male to verify which strain the female chose. Our *a*  
164 *priori* expectation was that the females hemizygous for the African allele will prefer African  
165 males, whereas females hemizygous for the non-African allele will mate indiscriminately.

166

#### 167 *Drosophila strains and crosses*

168           To determine whether *Nrg* and *shep* alleles contribute to female preference behavior  
169 between populations of *D. melanogaster* we needed to identify wild-type strains that show strong  
170 female mate preference and complementary strains that show no preference. Strains from  
171 Southern Africa were once considered to be a single lineage from the ancestral range and were  
172 referred to as Z-type. All other strains that migrated from the ancestral range (non-African and  
173 some Northern African strains) were considered a single cosmopolitan lineage and referred to as  
174 M-type. The M-type behavior contrasted with Z-type behavior in that M-type females often mate  
175 indiscriminately, showing no preference, whereas Z-type females strongly reject M-type males  
176 (Wu et al., 1995). Since this initial description, the demographic and evolutionary relationships  
177 between *D. melanogaster* populations have been shown to be more complex (Coughlan et al.,  
178 2021), and it is unlikely that all Z-type strains are a homogenous lineage.

179           We were able to choose strains based on geographic location and evaluated the female  
180 preference behavior for wild type females prior to using these strains in our crosses. For our  
181 representative African strain, we chose Z53 because its behavior profile is well documented and  
182 has been consistent across studies (Wu et al., 1995; Hollocher et al., 1997; Moran, 2006; Jin et  
183 al., 2022). For our representative non-African strain, we chose DGRP882 which we had  
184 previously used and had expected baseline behavior (Jin et al., 2022). The African admixture has  
185 been estimated for individuals of the DGRP panel (Pool, 2015) and DGRP882 has among the  
186 least amount of African ancestry making it most likely to be differentiated from African strains.  
187 In addition to these representative lines we also chose two additional African strains: Z30 and a  
188 more recently collected strain CH11. Canton-S was used as an additional non-African strain  
189 because it is commonly used in behavioral studies (Tompkins et al., 1982; Lasbleiz et al., 2006;  
190 Ng and Kopp, 2008; Kohlmeier et al., 2021).

191           To create heterozygote and hemizygote genotypes for our complementation tests, we  
192 chose to use loss of function mutant lines for both *shep* and *Nrg* that had been previously  
193 characterized as null alleles (*shep* Chen et al., 2014; *Nrg* Bieber et al., 1989; Enniking et al.,  
194 2013). Wild type females that have not mated (called virgins) readily mate with males. *shep* and  
195 *Nrg* mutant females that are virgin do not mate and instead show rejection behaviors when  
196 courted by males (*shep* Chen et al., 2014; *Nrg* Kerr et al. 1997; Carhan et al. 2005). We used the  
197 *shep*<sup>BG00836</sup> null mutation (BDSC #12513), hereafter *shep*<sup>-</sup>. Homozygous null mutant females for  
198 this allele are viable and mating deficient. For our complementation test we wanted to use a  
199 strain that carried *shep*<sup>-</sup> on one chromosome while the homologous chromosome was a balancer  
200 chromosome. We combined the *shep*<sup>-</sup> allele with the TM6B balancer chromosome. This  
201 balancer chromosome carries the dominant visible Humoral (*Hu*) mutation. We inbred progeny

202 from this original cross for three generations before using this strain in our behavioral assays.  
203 The mutant line and the line that contributed the TM6B chromosome were not the same genetic  
204 background so residual heterozygosity could be present in this strain. Any effects of this  
205 heterozygosity on the X chromosome and 2<sup>nd</sup> chromosome would occur in all of the  
206 crosses/treatments that we examined.

207 We used the *Nrg*<sup>17</sup> allele, which is synonymous with *Nrg*<sup>2</sup> and hereafter *Nrg*<sup>-</sup> (BDSC  
208 #5595). This specific *Nrg*<sup>-</sup> allele is homozygous lethal, so the stock is maintained with one X  
209 chromosome carrying *Nrg*<sup>-</sup> and the other X chromosome is the balancer FM7 chromosome. Fm7  
210 carries the dominant visible marker *Bar*.

211 Importantly both the *shep*<sup>-</sup> and *Nrg*<sup>-</sup> strains are non-African and carry non-African alleles  
212 of *shep* or *Nrg* on the respective balancer chromosomes. These alleles are not identical to  
213 DGRP882 or Canton S alleles, however, all non-African alleles are phenotypically more similar  
214 than they are to are to the African alleles, because they result in random mating.

215

### 216 *Experimental Crosses*

217 We crossed the *shep*/TM6B line to both DGRP882 and Z53 males to generate four F1  
218 females. Non-African heterozygotes (N/N) have two non-African *shep* alleles, one from the  
219 TM6B chromosome and one from the DGRP882 chromosome. Non-African hemizygotes (N/N-  
220 *shep*<sup>-</sup>) only have the non-African *shep* allele. We designate the *shep*<sup>-</sup> chromosome as N-*shep*<sup>-</sup> to  
221 highlight that the rest of the chromosome carries non-African (N) alleles. African heterozygotes  
222 (A/N) have an African allele from the Z53 chromosome and a non-African allele from the TM6B  
223 chromosome. African hemizygotes (A/N-*shep*<sup>-</sup>) only carry the African allele of *shep*.

224 We crossed the *Nrg*<sup>-</sup>/FM7 line to DGRP882 and Z53 similar to the design for *shep*. For  
225 experiments with *Nrg*, we tested two additional African and one non-African strains (described  
226 above) for two reasons. First, we were not sure how or if the *Bar* locus, which affects eye  
227 morphology, would affect female preference. This is particularly important because the impact of  
228 vision for female mating behavior could vary between strains. We tested the effect of *Bar*  
229 explicitly by including Canton S as an additional strain that should not exhibit strong mating  
230 preference. Second, even though our cline analysis identified *Nrg* as a strong outlier, this locus  
231 was only a marginal outlier in an independent study that identified putative female preference  
232 loci (Coughlan *et al.*, 2021). This could indicate that the effect of *Nrg* differs between strains and  
233 populations, or multiple alleles of *Nrg* segregate in African populations with only a subset  
234 contributing to female preference phenotypes. Either scenario could result in a situation where  
235 there is not a single high frequency allele contributing to female preference in African strains  
236 motivating us to test multiple African strains for this locus.

237

### 238 *Behavioral assay conditions*

239 All stocks and virgins were kept on standard cornmeal molasses media in an incubator on  
240 a 12:12 light cycle held at a constant 20 degrees Celsius and 50% humidity. Virgin males and  
241 females were collected within the first 0-4 hours post eclosion to ensure they had not mated.  
242 Females were phenotyped based on the presence of the dominant visible marker and housed in  
243 groups of 5-10. Males were housed individually because group housing can potentially change  
244 courtship vigor (Dixon *et al.* 2003). All individuals were allowed to age 7-10 days before  
245 experiments because this is the timeframe that produces the maximum number of matings for the  
246 African strains (Jin *et al.* 2022). All behavioral assays were performed in a room held at a

247 constant 20C degrees Celsius and 50% humidity within two hours of the incubator lights turning  
248 on to maximize the number of copulations we could observe.

249         The strains used in the experiment are phenotypically indistinguishable, so to be able to  
250 tell males apart we placed them on food containing blue food coloring 48 hours prior to the  
251 behavioral assay. This is a non-invasive, robust identification method (Wu et al., 1995;  
252 Hollocher et al., 1997). In these studies, all males received food dye treatment, but in our  
253 experiment, we only marked one male per mating with blue food dye. We found that we could  
254 more easily distinguish between a dyed and non-dyed male rather than distinguishing between  
255 males fed two different colors. We tested the effect of this treatment on female preference and  
256 found no effect (Supplementary Information).

257         We used males from the representative strains Z53 and DGRP882 for all binary choice  
258 tests. We collected all genotypes for a given locus in each block of our trials in equal numbers,  
259 but due to differences in the available genotypes after aging, our final number of females that  
260 were included differed for each genotype, but all genotypes were represented in each block.  
261 While the rearing conditions and behavior rooms conditions were very well controlled, our  
262 behavioral protocol also included completing a set of DGRP882 females in parallel to our  
263 experimental crosses. For each block of trials, 20 DGRP882 females were used as a behavioral  
264 control and we consistently had 8-12 (representing 40-60%) choosing Z males consistent with  
265 the random mating for this genotype, allowing us to conclude that the environment was not  
266 affecting our matings and pool replicates over blocks.

267

268 *Statistical analysis of behavioral data*

269 To analyze data from a quantitative complementation test using continuous traits, a linear model  
270 of the following structure is used (Equation 1; Pasyukova and Mackay 2000; Mackay 2001). The  
271 goal is to isolate the effects of the gene of interest on the phenotype while taking into account the  
272 difference in parental strains and any effects the balancer chromosome might have on the  
273 phenotype.

$$274 \quad y = \mu + \beta_1 x_1 + \beta_2 x_2 + \beta_3 x_1 x_2 \quad \text{Equation 1}$$

275 A full description of this analysis framework is included in the Supplemental Information.

276 For our behavioral preference experiments the data can be represented as binary choices.  
277 An individual female replicate chooses either the DGRP882 or the Z53 male, which can be  
278 represented as 0 and 1. Our statistical philosophy is to construct a model based on the properties  
279 of the data (Warton et al. 2016) and would lead us to using binomial regression. One benefit of  
280 the generalized linear models is that the same model structure can be used as Equation 1, except  
281 now the scale is in log-odds due to the logit transformation of the data. The logit link function is  
282 the most common link function for binomial regression (Equation 2).

$$283 \quad \text{logit}(p) = \mu + \beta_1 x_1 + \beta_2 x_2 + \beta_3 x_1 x_2 \quad \text{Equation 2}$$

284 While this approach matches the rich literature of complementation tests, there are some barriers  
285 to using this model, specifically in interpreting the interaction term for binomial regression and  
286 the lack of correspondence between interaction on the probability and logit scales. In the  
287 binomial regression the interaction is modelled as a multiplicative increase in odds (Hosmer et  
288 al., 2013) and because of the logit link the interaction is non-linear. As a result, there are well  
289 documented examples where even when a significant interaction effect for the logit model exists  
290 there will not always be a corresponding significant interaction on the probability scale (Hosmer  
291 et al., 2013). For a behavioral preference experiment, we are ultimately interested in the



315 for the African hemizygote genotype equivalent to what we would observe if we combined our  
316 coefficients from the interaction model to estimate the effect of this genotype.

317 In the results we report both the interaction models and the proposed alternative models.  
318 For interaction models we report coefficients and their corresponding p-values to remain  
319 consistent with other complementation test studies. For the alternative model we calculated 95%  
320 confidence intervals and determined whether any interval contained 0. We also provide results  
321 for the Wald's test specifically testing for differences in African genotypes. In the supplemental  
322 material we provide results for non-interaction models. The reason for these models is to  
323 compare them with interaction models and make observations about the stability, or lack thereof,  
324 of coefficients. This could suggest a poor fit of this group of models in estimating coefficients  
325 for our specific data and experimental design.

## 326 **Results**

### 327 *Female behavior loci are genomic outliers*

328 To generate candidate genes for functional validation, we leveraged genomic data from  
329 populations of *D. melanogaster* that exhibit a cline in African ancestry (Kao et al., 2015;  
330 Bergland et al., 2016) and African-like female preference behavior (Yukilevich and True, 2008).  
331 Our goal was to identify outlier genes that showed a steeper cline in African ancestry compared  
332 to the genome wide average. We used these genes to understand patterns of gene ontology  
333 enrichment and compared our list of candidates to independent analyses that used populations  
334 from Africa to identify female preference alleles (Coughlan et al., 2021) and changes in gene  
335 expression in female brains between these populations (Bailey et al. 2011).

336 We retained the top 1% of outliers for loci that had the steepest clines with African alleles  
337 being more frequent at lower latitudes. We determined whether SNPs occurred in annotated



338 genes, and retained these genes for a gene ontology (GO) enrichment analysis (Supplemental  
339 Table 1). We focused on biological function and observed a pattern where axon and neuron  
340 maintenance and development were enriched in our top 10 categories (Table 1). Courtship  
341 behavior also showed significant enrichment, and within that list were two genes, *alan shepard*  
342 (*shep*) and *Neuroglian (Nrg)* that contribute specifically to female behavior. Interestingly *Nrg*  
343 shows up as a gene contributing to many of the GO terms that show significant enrichment.

344 We next compared our list of outliers to those outliers identified in Coughlan et al (2021).  
345 Coughlan et al (2021) conducted a GO enrichment analysis, with a different focus, that returned  
346 similar terms including behavior, mushroom body formation (neurogenesis), and olfaction as  
347 enriched terms (Fig 4 of Coughlan et al 2021). When comparing the list of outliers highlighted in  
348 that study (Supplemental Table 2) to our list of outliers we found five genes in common. These  
349 included *shep*, *Rdl*, *rad*, *RunxA*, and *Dop2R*. *Nrg* was in the top 5% of outliers from the  
350 Coughlan et al 2021 study. In our final comparison we compared our list of outliers to genes that  
351 showed significantly different transcription in African and non-African female brains after  
352 exposure to both types of males (Bailey et al. 2011). In total there were 36 genes shared between  
353 these lists (Supplemental Table 3). The only gene that overlapped in all three studies was *shep*.

354 Given the patterns from GO enrichment analyses and comparisons with other data sets,  
355 we focused on *shep* and *Nrg* for functional tests. Previous behavioral analysis of homozygous  
356 viable mutant strains for these loci found evidence that these genes were involved female  
357 behavior (Carhan et al., 2005; Chen et al., 2014). Our goal was to use natural variation in *shep*  
358 and *Nrg* alleles to test for a role specifically in African female mate preference behavior.

359

360 *Population genetics and differentiation of shep and Nrg*

361 Using previously published genomic datasets that sampled a large number of strains, we  
362 looked at patterns of nucleotide diversity ( $\pi$ ) within two populations, patterns of differentiation  
363 ( $F_{st}$ ) between these populations, and structure for *Nrg* and *shep*.  $\pi$  and  $F_{st}$  were summarized for  
364 1 kb windows and compared to genome wide averages found in Lack et al (2016). For both *shep*  
365 and *Nrg* there was variability across the gene region for  $\pi$  and  $F_{st}$  (Table 2). While we would not  
366 necessarily expect the entire locus to be differentiated, *Nrg* had an average  $F_{st}$  that was greater  
367 than the genome wide average. The position of this locus on the X-chromosome could contribute  
368 to this pattern (reviewed in Meisel and Connallon 2013). Within both *shep* and *Nrg* there were  
369 windows with elevated  $F_{st}$  compared to the genome average. This differentiation was also  
370 captured by looking at the clustering of strains/genotypes in principal component space (Figure  
371 2). The strains largely clustered by population for both loci. For *shep* there was also structuring  
372 within the ZI population, likely due to the presence of the segregating In(3L)P inversion in this  
373 region of the genome (Pool et al 2012; Corbet-Dettig and Hartl 2012).

374

### 375 *Shep contributes to female mate preference in an African strain*

376 We used quantitative complementation tests to determine if *alan shepard* (*shep*) contributes to  
377 female mate preference. We were able to validate that *shep* contributes to female mate  
378 preference by specifically demonstrating that females that carry only the African *shep* allele  
379 (African hemizygotes:  $A/N\text{-}shep^{\sim}$ ) prefer African males to non-African males (Figure 3A). When  
380 these data were analyzed using a binomial regression that included an interaction, the model did  
381 not contain any significant coefficients (Table 3). This is not unexpected given the specifics of  
382 our data, the phenotypes of F1s from our crosses used, and the potential discordance between  
383 interactions on the probability vs log-odds scales (See Methods and Supplemental Information

384 for a full discussion). Given the clear trend for the African hemizygote females preference, we  
385 followed up with an alternative model that was chosen specifically to overcome these limitations  
386 (see Supplemental Information). This analysis indicated that the African hemizygote females  
387 (*A/N-shep*<sup>-</sup>) were the only genotype that had a significant mating preference (Table 4). All other  
388 genotypes had 95% confidence intervals that contained zero indicating that they were consistent  
389 with random mating. We compared preference of the African hemizygote (*A/N-shep*<sup>-</sup>) directly to  
390 the preference of African heterozygote (*A/N*) using a Wald's-test. This test indicated a  
391 significant difference in preference between these two genotypes ( $\chi^2_2 = 13.0$ ,  $P = 0.0015$ ). Both  
392 genotypes are primarily heterozygous across the entire genome for non-African and African  
393 alleles since they are hybrids. The main difference between these genotypes is at the *shep* locus.

394

#### 395 *Nrg* contributes female mate preference in African strains

396 We also used quantitative complementation tests to validate the role of *Nrg* alleles on female  
397 mate preference in African strains. Our design and logic were identical for what we used to  
398 analyze *shep*. For this gene we included more genotypes to determine if the visible marker on the  
399 FM7 balancer chromosome, *Bar*, which affects eye phenotypes was in turn affecting mating  
400 behavior. We also tested whether different African *Nrg* alleles might show different affects on  
401 female mate preference.

402 To test for the affects of the *Bar* allele specifically on female behavior we tested the  
403 behavior of another non-African strain, Canton S, and compared it to the DGRP882 strain. We  
404 used Canton S because we had a clear expectation: that both female genotypes from a cross  
405 between Canton S and the *Nrg*<sup>-</sup> strain should have the same behavior as the DGRP882  
406 genotypes, and they should mate randomly and not show preference for either male genotype.

407 We in fact observed that these genotypes mated indiscriminately, and we did not detect any  
408 significant difference in behavior comparing DGRP882 genotypes and Canton S genotypes  
409 (Supplemental Figure 2; Supplemental Table 5).

410 We then tested *Nrg* alleles from three African strains for effects on female mate  
411 preference. The first strain CH11 provided inconclusive results because females from both the  
412 heterozygote and hemizygote genotypes showed strong preference for Z53 males and had  
413 confidence intervals that were greater than 0 (Supplemental Figure 2; Supplemental Table 5).  
414 The dominant female preference from this strain precluded our ability to test the effect of the  
415 CH11 *Nrg* allele specifically.

416 The remaining two African strains had a pattern consistent with *Nrg* contributing to  
417 female mate preference (Figure 3B; Table 4). While binomial interaction models did not indicate  
418 a significant interaction effect (Table 3) alternative models suggested increased preference for  
419 the African hemizygotes ( $A/N-Nrg^-$ ) exclusively as these genotypes were the only ones with 95%  
420 confidence intervals that did not contain 0 (Table 4). Additionally a Walds-test indicated a  
421 significant difference between African hemizygotes ( $A/N-Nrg^-$ ) and African heterozygotes ( $A/N$ )  
422 for both strains ( $Z53 \chi^2_2 = 8.5, P = 0.015$  ;  $Z30 \chi^2_2 = 17.9, P = 0.00013$ ).

423

## 424 **Discussion**

425 Identifying genes that contribute to female mate preference is an important first step in  
426 understanding how this important behavior evolves and contributes to the evolution of  
427 reproductive isolation and speciation. In this study, we demonstrate that *shep* and *Nrg* play a role  
428 in female mate preference in some African strains. Our current study is one of very few studies  
429 that has identified loci with direct genetic evidence for female mate preference (Chowdhury et

430 al., 2020) and importantly in a system where premating isolation is the strongest and most  
431 relevant barrier to reproduction. These African populations of *D. melanogaster* have been a  
432 historically important system in the study of speciation (Wu et al., 1995; Coyne et al., 1999;  
433 Greenberg et al., 2003), and we have now identified, in part, genes that could contribute to  
434 premating isolation in this system. Since the genetic basis of behavior is complex, and we  
435 observed variation in behavior among strains (see below), it will be important to test the roles of  
436 *shep* and *Nrg* in more strains from different locations within Africa. Regardless, these remain  
437 promising candidates that we can leverage to understand the evolution of behavior. For example,  
438 when this *D. melanogaster* system was initially described, mapping studies were only able to  
439 identify large chromosomal regions on chromosome 3, the largest contributor to premating  
440 isolation, and the X chromosome (Hollocher et al., 1997; Takahashi and Ting, 2004). Combining  
441 population genetics with complementation tests, we identified a gene on chromosome 3, *shep* is  
442 on 3L, and the X chromosome, *Nrg*, that contribute to female preference behavior. Getting gene  
443 scale resolution will allow us to further understand how female mate preference has evolved.  
444 Since both *Nrg* and *shep* are essential for neurodevelopment and female mating behavior  
445 (Carhan et al., 2005; Chen et al., 2014), the identification of their role in female preference in  
446 African strains can potentially hint at sensory pathways that are important for mating decisions  
447 and partial reproductive isolation.

448         Female preference can evolve when structures/genes that are involved in sensory  
449 perception evolve, when brain centers important for learning/decision making evolve, or when  
450 both evolve in tandem (Stevens, 2013; Schaefer and Ruxton, 2015; Munson et al., 2020). Many  
451 studies have documented the role that female preference plays in reproductive isolation  
452 (Laturney and Moehring 2012), and further demonstrating how sexual selection can shape

453 evolution of female preference and the genetic architecture of female preference (Xu and Shaw  
454 2021). Both *shep* and *Nrg* regulate neurological development, specifically neural remodeling  
455 during metamorphosis, contributing heavily to the formation of higher learning centers,  
456 specifically those responsible for processing olfactory signals (Carhan et al., 2005; Chen et al.,  
457 2014). Our gene ontology results highlight a role for genes involved in neurogenesis and  
458 behavior that complements other gene ontology analyses that suggest outlier genes are involved  
459 in sensory perception and neurological development.

460 Previous work in African populations of *D. melanogaster* has suggested a large role for  
461 olfaction in female mate preference (Grillet et al., 2012; Moran, 2006; Jin et al., 2022) and it is  
462 possible that *Nrg* and *shep* may contribute to these observed patterns. *Nrg* controls, in part, the  
463 development of the mushroom body (Goosens et al 2011; ) which is a structure in *Drosophila*  
464 that processes olfactory information (Li et al 2020). It is possible that differences in *Nrg* across  
465 populations could result in differences in the mushroom body, either at the gross anatomical  
466 level, or at the circuit level and how it receives input from olfactory receptors (Akalal et al.  
467 2006). In closely related species of *Drosophila* differences in olfactory preference can be  
468 explained by the connections made between olfactory receptors and the mushroom body (Ellis et  
469 al. 2023). *shep* is an RNA/DNA binding gene that regulates alternative splicing (Chen et al.  
470 2018; Olesnicky et al. 2018). Given the evidence for changes in *shep* expression in African and  
471 non-African strains under different mating conditions (Bailey et al. 2011) *shep* might regulate  
472 targets in specific neurons that contribute to mating behaviors . It has been demonstrated that  
473 *shep* has specific targets during neuronal remodeling (Chen et al 2018) and might interact with  
474 this or other targets in the adult brain (Olesniky 2018). Polymorphisms in the coding regions of  
475 either gene could alter interactions with other genes/targets during neuronal development.

476 Changes in regulatory regions and/or introns could change expression patterns. More work is  
477 needed to establish functional differences between African and non-African alleles. Specifically  
478 whether functional changes in the neural networks of females are correlated with the olfactory  
479 cues used in mate preference. Regardless, while we observed large effects of these single loci,  
480 the genetic basis of female preference is likely complex, with additional loci contributing to  
481 isolation in these strains.

482 One interesting observation that could suggest that more than these two loci contribute to  
483 female preference is the variation in dominance that we observed for female mating preference in  
484 hybrids between non-African and African strains. In our experiment, we used three African  
485 strains that show strong preference for African males and never choose non-African males in  
486 choice tests. We observed that female mate preference was recessive in F1 hybrids for two of the  
487 strains and dominant in F1 hybrids the third strain when crossed to the same non-African strain  
488 (see Results). The dominance in the CH11 strain precluded us from testing the effects of *Nrg* on  
489 female preference for that strain. When assessing how important *shep* and *Nrg* are in  
490 reproductive isolation across strains different mutations (i.e. CRISPR knockouts) can be used to  
491 circumvent this issue. Nevertheless, testing both the effects of *shep* and *Nrg* and the dominance  
492 of female behavior in more strains will be informative in and of itself and could highlight how  
493 general this phenomenon is. This will be important for two reasons. First, if more strains show  
494 effects of *shep* and *Nrg* on female preference this could suggest these genes are critical for  
495 reproductive isolation in the system (see below). However, it should be cautioned that at early  
496 stages of divergence we do not necessarily expect fixed differences between populations (Cutter,  
497 2012; Castillo and Barbash, 2017). This contrasts with reproductive isolation between species  
498 where we would assume genetic differences are fixed (Laturney and Moehring 2012). Second, in

499 terms of dominance, looking for general patterns will be important because the dominance of  
500 reproductive barriers can have strong impacts on the outcome of speciation (Thompson et al.,  
501 2021) and might indicate how particular mating barriers evolve.

502 Differences in dominance for female mate preference could reflect differences in the  
503 selective environment caused by local mating dynamics. This scenario would be analogous to  
504 parallel vs non-parallel evolution of ecological traits in different environments (Oke et al., 2017;  
505 Bolnick et al., 2018). If different populations experience different selective pressures, that is  
506 there is variation in male courtship behavior and female preference across populations, then  
507 different alleles of *shep* and *Nrg* could segregate in these populations. African lineages are quite  
508 diverse in terms of courtship behaviors (Colgrave et al 2000; Yukilevich and True 2008; Jin et  
509 al. 2022) and while strong premating isolation is found in many populations it is likely that  
510 female preferences and associated alleles could be segregating within Africa (Yukilevich and  
511 True, 2008; Coughlan et al 2021) Another possibility, that is not mutually exclusive, is that  
512 different genes contribute to female mate preference in different populations. This would  
513 generate a pattern where genes show effects on behavior for some hybrid genotypes, but not  
514 others. Given the limited data on the genetic basis of female preference it is difficult to infer the  
515 likelihood of this process, but polymorphic incompatibilities are common in other systems  
516 (Cutter, 2012; Castillo and Barbash, 2017).

517 One example in *Drosophila* suggests that the genetic architecture of premating isolation  
518 can be variable. When different strains of *D. simulans* were crossed and tested for mate rejection  
519 of *D. melanogaster*, different numbers, locations, and dominance of quantitative trait loci were  
520 identified that were strain specific (Uenoyama and Inoue, 1995; Carracedo et al., 1998a;  
521 Carracedo et al., 1998b; Carracedo et al., 2000). The variation in dominance and the number of



522 loci contributing to mate preference in this *D. simulans* example might be consistent with this  
523 barrier evolving after the speciation event that separated these lineages (Laturney and Moehring,  
524 2012). Moving forward it will be important to determine how common it is for variable loci to  
525 contribute to premating isolation or uniform genetic architecture for reproductive isolation  
526 between populations. Either way, the difference in dominance suggests there may be standing  
527 variation for female mate preference that selection can act on, which is known to facilitate the  
528 evolution of premating isolation through sexual selection (Mendelson et al., 2014; Castillo and  
529 Delph, 2016).

530 Overall, our results provide evidence for two neurodevelopmental genes, *Nrg* and *shep*,  
531 contributing to female mate preference in African strains, suggesting that these genes could  
532 contribute to mating preferences between populations of *D. melanogaster*. Our results connect  
533 population genetics from a behavioral cline, to allelic diversity in African and non-African  
534 populations, to functional validation of the affect of these genes on female African preference  
535 behavior. The differences in alleles for both loci in non-African vs African populations should be  
536 further explored and the testing of more strains are needed to determine whether these genes  
537 could contribute to reproductive isolation. Understanding the functional consequences of  
538 different alleles on neural circuits and sensory perception for specific alleles could provide  
539 insight into how female preference evolved in this system, and provide a framework for  
540 exploring these type of data in other systems. Ultimately, this could lead to understand common  
541 patterns for the evolution of female mate preference and the genetic and neural level.

542

543

544 **Literature Cited**

- 545 Ai, C.R., Norton, E.C., 2003. Interaction terms in logit and probit models. *Economic Letters* 80,  
546 123-129.
- 547 Akalal, D.B., Wilson, C.F., Zong, L., Tanaka, N.K., Ito, K., Davis, R.L. 2006. Roles for  
548 *Drosophila* mushroom body neurons in olfactory learning and memory. 13:659-68.
- 549 Andersson, M., 2019. Sexual selection. Princeton University Press.
- 550 Bailey, R.R., Innocenti, P., Morrow, E.H., Friberg, U., Qvarnström, A. 2011. Female *Drosophila*  
551 *melanogaster* gene expression and mate choice: the X chromosome harbours candidate  
552 genes underlying sexual isolation. *Plos One* 6: e17358.
- 553 Bay, R.A., Arnegard, M.E., Conte, G.L., Best, J., Bedford, N.L., McCann, S.R., Dubin, M.E.,  
554 Chan, Y.F., Jones, F.C., Kingsley, D.M., Schluter, D., Peichel, C.L., 2017. Genetic  
555 Coupling of Female Mate Choice with Polygenic Ecological Divergence Facilitates  
556 Stickleback Speciation. *Current Biology* 27, 3344-3349.e4.
- 557 Bergland, A.O., Tobler, R., González, J., Schmidt, P., Petrov, D., 2016. Secondary contact and  
558 local adaptation contribute to genome-wide patterns of clinal variation in *Drosophila*  
559 *melanogaster*. *Mol Ecol* 25, 1157–1174.
- 560 Bieber, A.J., Snow, P.M., Hortsch, M., Patel, N.H., Jacobse, J.R., Traquina, Z.R., Schilling, J.,  
561 Goodman C.S., 1989. *Drosophila* neuroglian: a member of the immunoglobulin  
562 superfamily with extensive homology to the vertebrate neural adhesion molecule L1. *Cell*  
563 59, 447-460.
- 564 Blankers, T., Berdan, E.L., Hennig, R.M., Mayer, F., 2019. Physical linkage and mate preference  
565 generate linkage disequilibrium for behavioral isolation in two parapatric crickets.  
566 *Evolution* 73, 777–791.
- 567 Boake, C.R., Arnold, S.J., Breden, F., Meffert, L.M., Ritchie, M.G., Taylor, B.J., Wolf, J.B.,  
568 Moore, A.J., 2002. Genetic tools for studying adaptation and the evolution of behavior.  
569 the american naturalist 160, S143–S159.
- 570 Bolnick, D.I., Barrett, R.D.H., Oke, K.B., Rennison, D.J., Stuart, Y.E., 2018. (Non)Parallel  
571 Evolution. *Annu. Rev. Ecol. Evol. Syst.* 49, 303–330.
- 572 Carhan, A., Allen, F., Armstrong, J.D., Goodwin, S.F., O’Dell, K.M.C., 2005. Female receptivity  
573 phenotype of icebox mutants caused by a mutation in the L1-type cell adhesion molecule  
574 neuroglian. *Genes Brain Behav* 4, 449–465.
- 575 Carracedo, M., Asenjo, A., Casares, P., 1998a. Brief communication. Inheritance mode of  
576 *Drosophila simulans* female mating propensity with *D. melanogaster* males. *Journal of*  
577 *Heredity* 89, 101–104.
- 578 Carracedo, M.C., Suarez, A., Asenjo, A., Casares, P., 1998b. Genetics of hybridization between  
579 *Drosophila simulans* females and *D. melanogaster* males. *Heredity* 80, 17–24.
- 580 Carracedo, M.C., Suarez, C., Casares, P., 2000. Sexual isolation between *Drosophila*  
581 *melanogaster*, *D. simulans* and *D. mauritiana*: sex and species specific discrimination.  
582 *Genetica* 108, 155–162.
- 583 Castillo, D.M., Barbash, D.A., 2017. Moving Speciation Genetics Forward: Modern Techniques  
584 Build on Foundational Studies in *Drosophila*. *Genetics* 207, 825–842.
- 585 Castillo, D.M., Delph, L.F., 2016. Male–female genotype interactions maintain variation in traits  
586 important for sexual interactions and reproductive isolation. *Evolution* 70, 1667–1673.
- 587 Chen, D., Qu, C., Bjorum, S.M., Beckingham, K.M., Hewes, R.S., 2014. Neuronal Remodeling  
588 During Metamorphosis Is Regulated by the *alan shepard* (*shep*) Gene in *Drosophila*  
589 *melanogaster*. *Genetics* 197, 1267–1283.
- 590 Chen, D., Dale, R.K., Lei, E.P. 2018. *shep* regulates *Drosophila* neuronal remodeling by

- 591 controlling transcription of its chromatin targets. *Development* 145: dev154047.
- 592 Chen, E.Y., Tan, C.M., Kou, Y., Duan, Q., Wang, Z., Meirelles G.V., Clark, N.R., Ma'ayan A.
- 593 2013. Enrichr: interactive and collaborative HTML gene list enrichment analysis tool.
- 594 *BMC Bioinformatics*, 128.
- 595 Chen, J.J., 2003. Communication complex information: the interpretation of statistical
- 596 interaction in multiple logistic regression analysis. *American Journal of Public Health* 93,
- 597 1376-1377.
- 598 Chenoweth, S.F., Blows, M.W., 2006. Dissecting the complex genetic basis of mate choice.
- 599 *Nature Reviews Genetics* 7, 681–692.
- 600 Chowdhury, T., Calhoun, R.M., Bruch, K., Moehring, A.J., 2020. The *fruitless* gene affects
- 601 female receptivity and species isolation. *Proc. R. Soc. B.* 287, 20192765.
- 602 Colegrave, N., Hollocher, H., Hinton, K., Ritchie, M.G. 2000. The courtship song of African
- 603 *Drosophila melanogaster*. *J. Evol. Biol* 13:143-150.
- 604 Comeault, A.A., Serrato-Capuchina, A., Turissini, D.A., McLaughlin, P.J., David, J.R., Matute,
- 605 D.R., 2017. A nonrandom subset of olfactory genes is associated with host preference in
- 606 the fruit fly *Drosophila orena*: Behavioral Specialization In *D. Orena*. *Evolution Letters*
- 607 1, 73–85.
- 608 Corbett-Detig, R.B., Hartl, D.L. 2012 Population genomics of inversion polymorphisms in
- 609 *Drosophila melanogaster*. *PLoS Genet.* 12:e1003056.
- 610 Coughlan, J.M., Dagilis, A.J., Serrato-Capuchina, A., Elias, H., Peede, D., Isbell, K., Castillo,
- 611 D.M., Cooper, B.S., Matute, D.R., 2021. Patterns of and processes shaping population
- 612 structure and introgression among recently differentiated *Drosophila melanogaster*
- 613 populations. *bioRxiv* 2021.06.25.449842.
- 614 Coyne, J.A., Orr, H.A., 2004. *Speciation*. Sinauer associates Sunderland, MA.
- 615 Coyne, J.A., Orr, H.A., 1989. Patterns of speciation in *Drosophila*. *Evolution* 43, 362–381.
- 616 Coyne, J.A., Wicker-Thomas, C., Jallon, J.-M., 1999. A gene responsible for a cuticular
- 617 hydrocarbon polymorphism in *Drosophila melanogaster*. *Genet. Res.* 73, 189–203.
- 618 Cutter, A.D., 2012. The polymorphic prelude to Bateson–Dobzhansky–Muller incompatibilities.
- 619 *Trends in Ecology & Evolution* 27, 209–218.
- 620 Ellis, K.E., Bervoets, S., Smihula, H., Ganguly, I., Vigato, E., Auer, To.O., Benton, R., Litwin-
- 621 Kumar, A., Caron, S.J.C. 2023. Evolution of connectivity architecture in the *Drosophila*
- 622 mushroom body. *bioRxiv* 2023.02.10.528036.
- 623 Enneking, E.M., Kudumala, S.R., Moreno, E., Stephan, R., Boerner, J., Godenschwege, T.A.,
- 624 Pielage, J., 2013. Transsynaptic coordination of synaptic growth, function, and stability
- 625 by the L1-type CAM *Neuroglian*. *Plos Biology* 11, e1001537.
- 626 Fisher, R.A., 1930. *The genetical theory of natural selection*. Clarendon Press
- 627 Gray, D.A., 2022. Sexual selection and ‘species recognition’ revisited: serial processing and
- 628 order-of-operations in mate choice. *Proc. R. Soc. B.* 289, 20212687.
- 629 Greenberg, A.J., Moran, J.R., Coyne, J.A., Wu, C.-I., 2003. Ecological Adaptation During
- 630 Incipient Speciation Revealed by Precise Gene Replacement. *Science* 302, 1754–1757.
- 631 Grillet, M., Everaerts, C., Houot, B., Ritchie, M.G., Cobb, M., Ferveur, J.-F., 2012. Incipient
- 632 speciation in *Drosophila melanogaster* involves chemical signals. *Sci Rep* 2, 224.
- 633 Goossens, T., Kang, Y.Y., Wuytens, G., Zimmermann, P., Callaerts-Végh, Z., Pollarolo, G.,
- 634 Islam, R., Hortsch, M., Callaerts, P. 2011. The *Drosophila* L1CAM homolog *Neuroglian*
- 635 signals through distinct pathways to control different aspects of mushroom body axon
- 636 development. *Development* 138:1595-605.

- 637 Harrison, R.G., Larson, E.L., 2014. Hybridization, Introgression, and the Nature of Species  
638 Boundaries. *Journal of Heredity* 105, 795–809.
- 639 Hervas, S., Sanz, E., Casillas, S., Pool, J.E., Barbadilla, A. 2017. PopFly: the *Drosophila*  
640 population genomics browser. *Bioinformatics* 33: 2779-2780;
- 641 Hollocher, H., Ting, C.-T., Wu, M.-L., Wu, C.-I., 1997c. Incipient Speciation by Sexual Isolation  
642 in *Drosophila melanogaster*: Extensive Genetic Divergence Without Reinforcement.  
643 *Genetics* 147, 1191–1201.
- 644 Hosmer, D.W., Lemeshow, S., Sturdivant, R.X., Applied Logistic Regression 3 ed. John Wiley  
645 & Sons, Inc., Hoboken, New Jersey.
- 646 Jaccard, J. 2001. Interaction effects in logistic regression (Vol. 135). Sage, Thousand Oaks, CA.
- 647 Jin, B., Barbash, D.A., Castillo, D.M., 2022. Divergent selection on behavioural and chemical  
648 traits between reproductively isolated populations of *Drosophila melanogaster*. *J of*  
649 *Evolutionary Biology* jeb.14007.
- 650 Kao, J.Y., Zubair, A. Salomon, M.P., Nuzhdin, S.V., Campo, D., 2015. Population genomic  
651 analysis uncovers African and European admixture in *Drosophila melanogaster*  
652 populations from the south-eastern United States and Caribbean Islands. *Molecular*  
653 *Ecology* 24, 1499-1509.
- 654 Kapopoulou, A., Pfeifer, S.P., Jensen, J.D., Laurent, S. 2018. The demographic history of  
655 African *Drosophila melanogaster*. *Genome Bio. Evol.* 10:2338-2342.
- 656 Kerr, C., Ringo, J., Dowse, H., Johnson, E. 1997. Icebox, a recessive X-linked mutation in  
657 *Drosophila* causing low sexual receptivity. *J. Neurogenet.* 11: 213--229.
- 658 Kopp, M., Servedio, M.R., Mendelson, T.C., Safran, R.J., Rodríguez, R.L., Hauber, M.E.,  
659 Scordato, E.C., Symes, L.B., Balakrishnan, C.N., Zonana, D.M., van Doorn, G.S., 2018.  
660 Mechanisms of Assortative Mating in Speciation with Gene Flow: Connecting Theory  
661 and Empirical Research. *The American Naturalist* 191, 1–20.
- 662 Kuleshov, M.V., Jones, M.R, Rouillard, E.D., Fernandez N.F., Duan Q., Wang Z., Koplev S.,  
663 Jenkins S.L., Jagodnik K.M., Lachmann A., McDermott M.G., Monteiro C.D.,  
664 Gundersen G.W., Ma'ayan A. 2016. Enrichr: a comprehensive gene set enrichment  
665 analysis web server 2016 update. *Nucleic Acids Research*, gkw377.
- 666 Lack, J.B., Lange J.D., Tang A.D., Corbett-Detig R.B., Pool J.E. 2016. A thousand fly genomes:  
667 an expanded *Drosophila* genome nexus. *Mol Biol Evol.* 33:3308-3313.
- 668 Laturney, M., Moehring, A.J., 2012. The Genetic Basis of Female Mate Preference and Species  
669 Isolation in *Drosophila*. *International Journal of Evolutionary Biology* 2012, 1–13.
- 670 Li, F., Lindsey, J.W., Marin, E C., Otto, N., Dreher, M., Dempsey, G., et al. 2020. The  
671 connectome of the adult *Drosophila* mushroom body provides insights into function. *Elife*  
672 9:e62576.
- 673 Mackay, T.F.C., 2001. Quantitative trait loci in *Drosophila*. *Nat Rev Genet* 2, 11–20.
- 674 Meisel R. P., Connallon T., 2013. The faster-X effect: integrating theory and data. *Trends Genet.*  
675 29: 537–544.
- 676 Mendelson, T.C., Martin, M.D., Flaxman, S.M., 2014. Mutation-order divergence by sexual  
677 selection: diversification of sexual signals in similar environments as a first step in  
678 speciation. *Ecol Lett* 17, 1053–1066.
- 679 Mendelson, T.C., Shaw, K.L., 2012. The (mis) concept of species recognition. *Trends in ecology*  
680 *& evolution* 27, 421–427.
- 681 Miller, D.E, Cook, K.R., Hawley, R.S. 2019. The joy of balancers. *PLoS Genet* 7:e1008421.

- 682 Moran, J.R., 2006. The Genetics of Pre-mating Isolation at the Incipient Stage of Speciation in  
683 *Drosophila Melanogaster*. University of Chicago, Committee on Genetics.
- 684 Muller, H.1918. Genetic variability, twin hybrids and constant hybrids, in a case of balanced  
685 lethal factors. *Genetics* 3: 422-499.
- 686 Munson, A.A., Jones, C., Schraft, H., Sih, A., 2020. You're Just My Type: Mate Choice and  
687 Behavioral Types. *Trends in Ecology & Evolution* 35, 823–833.
- 688 Neelon, D.P., Rodríguez, R.L., Höbel, G., 2019. On the architecture of mate choice decisions:  
689 preference functions and choosiness are distinct traits. *Proc. R. Soc. B.* 286, 20182830.
- 690 Oke, K.B., Rolshausen, G., LeBlond, C., Hendry, A.P., 2017. How Parallel Is Parallel Evolution?  
691 A Comparative Analysis in Fishes. *The American Naturalist* 190, 1–16.
- 692 Olesnicky, E.C., Antonacci, S., Popitsch, N., Lybecker, M.C., Titus, M.B., Valadez, R., Derkach,  
693 P.G., Marean, A., Miller, K., Mathai, S.K., Killian, D.J. 2018. *shep* interacts with  
694 posttranscriptional regulators to control dendrite morphogenesis in sensory neurons.  
695 *Dev. Biol.* 444: 116-128.
- 696 Pool, J.E., 2015. The mosaic ancestry of the *Drosophila* genetic reference panel and the *D.*  
697 *melanogaster* reference genome reveals a network of epistatic fitness interactions.  
698 *Molecular biology and evolution* 32, 3236–3251.
- 699 Safran, R.J., Scordato, E.S.C., Symes, L.B., Rodríguez, R.L., Mendelson, T.C., 2013.  
700 Contributions of natural and sexual selection to the evolution of premating reproductive  
701 isolation: a research agenda. *Trends in Ecology & Evolution* 28, 643–650.
- 702 Schaefer, H.M., Ruxton, G.D., 2015. Signal Diversity, Sexual Selection, and Speciation. *Annu.*  
703 *Rev. Ecol. Evol. Syst.* 46, 573–592.
- 704 Serrato-Capuchina, A., Schwochert, T.D., Zhang, S., Roy, B., Peede, D., Koppelman, C.,  
705 Matute, D.R., 2021. Pure species discriminate against hybrids in the *Drosophila*  
706 *melanogaster* species subgroup. *Evolution* 75, 1753–1774.
- 707 Sprengelmeyer, Q.D., Mansourian S., Lange J.D., Matute D.R., Cooper B.S., Jirle E.V.,  
708 Stensmyr M.C., Pool J.E. 2020. Recurrent collection of *Drosophila melanogaster* from  
709 wild African environments and genomic insights into species history. *Mol Biol Evol.*  
710 2020 37:627-638.
- 711 Stevens, M., 2013. Sensory ecology, behaviour, and evolution. Oxford University Press.
- 712 Svensson, O., Woodhouse, K., van Oosterhout, C., Smith, A., Turner, G.F., Seehausen, O., 2017.  
713 The genetics of mate preferences in hybrids between two young and sympatric Lake  
714 Victoria cichlid species. *Proc. R. Soc. B.* 284, 20162332.
- 715 Takahashi, A., Ting, C.-T., 2004. Genetic Basis of Sexual Isolation in *Drosophila melanogaster*.  
716 *Genetica* 120, 273–284.
- 717 The Gene Ontology Consortium. 2017. Expansion of the Gene Ontology knowledgebase and  
718 resources. *Nuclei Acids Res.* 45: D331-D338.
- 719 Thompson, K.A., Urquhart-Cronish, M., Whitney, K.D., Rieseberg, L.H., Schluter, D., 2021.  
720 Patterns, Predictors, and Consequences of Dominance in Hybrids. *The American*  
721 *Naturalist* 197, E72–E88.
- 722 Turissini, D.A., McGirr, J.A., Patel, S.S., David, J.R., Matute, D.R., 2018. The rate of evolution  
723 of postmating-prezygotic reproductive isolation in *Drosophila*. *Molecular Biology and*  
724 *Evolution* 35, 312–334.
- 725 Turner, T.L., Stewart, A.D., Fields, A.T., Rice, W.R., Tarone, A.M., 2011. Population-Based  
726 Resequencing of Experimentally Evolved Populations Reveals the Genetic Basis of Body  
727 Size Variation in *Drosophila melanogaster*. *PLoS Genet* 7, e1001336.

- 728 Uenoyama, T., Inoue, Y., 1995. Genetic studies on premating isolation in *Drosophila simulans*.  
729 I. A *D. simulans* line highly crossable with *D. melanogaster*. The Japanese Journal of  
730 Genetics 70, 365–371.
- 731 Warton, D.I., Lyons, M., Stoklosa, J., Ives, A.R. 2016. Three points to consider when choosing a  
732 LM or GLM test for count data. Methods in Ecol and Evol 7:882-890.
- 733 Wu, C.-I., Hollocher, H., Begun, D.J., Aquadro, C.F., Xu, Y., Wu, M.-L., 1995. Sexual isolation  
734 in *Drosophila melanogaster*: a possible case of incipient speciation. Proceedings of the  
735 National academy of sciences 92, 2519–2523.
- 736 Xu, M., Shaw, K.L., 2019a. Genetic coupling of signal and preference facilitates sexual isolation  
737 during rapid speciation. Proc. R. Soc. B. 286, 20191607.
- 738 Xu, M., Shaw, K.L., 2019b. The genetics of mating song evolution underlying rapid speciation:  
739 linking quantitative variation to candidate genes for behavioral isolation. Genetics  
740 211:1089-1104.
- 741 Xu, M., Shaw, K.L., 2021. Extensive linkage and genetic coupling of song and preference loci  
742 underlying rapid speciation in *Laupala* crickets. J. Heredity 112:204-213.
- 743 Yamamoto, D., Koganezawa, M., 2013. Genes and circuits of courtship behaviour in *Drosophila*  
744 males. Nat Rev Neurosci 14, 681–692.
- 745 Yukilevich, R., True, J.R., 2008. African Morphology, Behavior and Phermones Underlie  
746 Incipient Sexual Isolation between US and Caribbean *Drosophila melanogaster*.  
747 Evolution 62, 2807–2828.  
748

749 **Table 1.** GO enrichment analysis using biological function highlights genes involved in neuronal  
 750 development and behavior. Included are the top 10 GO terms with their representation in the data  
 751 set and adjusted p-values after correcting for multiple testing.  
 752

| GO Term                              | Overlap | Z-score | Adjusted P-value | Genes                                                                                                                                                    |
|--------------------------------------|---------|---------|------------------|----------------------------------------------------------------------------------------------------------------------------------------------------------|
| axon guidance                        | 27/242  | -1.06   | 1.2E-09          | <i>Nrg</i> ;Ptp61F;jeb;egh;msn;beat-Vc;tup;tok;robo2;CadN2;Wnt4;grn;Trim9;side;ko;SCAR;beat-Ia;NT1;beat-IIa;trol;sli;CadN;RhoGEF64C;beat-Ib;Lar;cher;mud |
| axonogenesis                         | 24/212  | -1.08   | 8.2E-09          | spri; <i>Nrg</i> ;Trim9;Ptp61F;jeb;SCAR;egh;beat-Ia;msn;NT1;sick;tup;sli;tok;Gclc;robo2;fz;Sh;CadN;dnc;RhoGEF64C;Lar;mud;tai                             |
| motor neuron axon guidance           | 15/75   | -1.56   | 1.1E-08          | <i>Nrg</i> ;grn;side;ko;beat-Ia;NT1;beat-IIa;beat-Vc;trol;tup;tok;beat-Ib;Lar;cher;Wnt4                                                                  |
| cell-cell adhesion                   | 13/64   | -1.80   | 1.4E-07          | spri; <i>Nrg</i> ;fz;Sh;SCAR;CadN;CadN2;dnc;Lar;tai                                                                                                      |
| axon extension                       | 10/36   | -1.96   | 4.6E-07          | Con;Cad88C;klg;beat-Ia;beat-IIa;beat-Vc;kirre;rst;fz;CadN;CadN2;beat-Ib;CG34353                                                                          |
| courtship behavior                   | 15/109  | -1.17   | 1.3E-06          | <i>Nrg</i> ;cac;orb2;egh;fru;Gr58b;Gr77a;eloF;5-HT7;Sh; <i>shep</i> ;TfAP-2;dnc;per;dlg1                                                                 |
| homophillic cell adhesion            | 8/28    | -2.45   | 1.1E-05          | kirre;rst;Con;fz;CadN;klg;CadN2;CG34353                                                                                                                  |
| wing morphogenesis                   | 20/240  | -1.13   | 2.0E-05          | disco-r;Spn88Ea;d;bi;fru;dpy;inv;Lpt;bs;tok;Gclc;Fkbp14;fz;EcR;Raf;cv-2;sfl;GEFmeso;hth;Dys                                                              |
| neuron projection extension          | 8/31    | -2.37   | 2.0E-05          | spri; <i>Nrg</i> ;fz;Sh;CadN;dnc;Lar;tai                                                                                                                 |
| anterograde trans-synaptic signaling | 12/89   | -1.45   | 3.3E-05          | Cep89;Shab;CDase;Dop1R1;5-HT7;cac;X11Lbeta;dnc;nAChRalpha5;Sap47;Rdl;dlg1                                                                                |

753 **Table 2.** The summary of population genetic statistics between the Raleigh (RAL) population,  
 754 representing non-African populations, and Zambia (ZI), representing African populations, for  
 755 *shep* and *Nrg*. Average values are provided for reference and come from Lack et al. (2016). The  
 756 mean across windows is provided with the (min, max) in parentheses.  
 757  
 758

| Gene            | RAL pi                                  | ZI pi                                  | Fst                                |
|-----------------|-----------------------------------------|----------------------------------------|------------------------------------|
| <i>shep</i>     | <b>0.0078</b><br>(0.0011,0.0202)        | <b>0.0115</b><br>(0.0030,0.0253)       | <b>0.1575</b><br>(0.0306, 0.4478)  |
| <i>Nrg</i>      | <b>0.0047</b><br>(0.0002,0.0140)        | <b>0.0104</b><br>(0.0037,0.0262)       | <b>0.2728</b><br>(0.0911,0.5788)   |
| <b>Averages</b> | <b>RAL average pi</b><br><b>0.00569</b> | <b>ZI average pi</b><br><b>0.00843</b> | <b>Average Fst</b><br><b>0.187</b> |

759

760 **Table 3.** The analysis of female mating behavior using binomial regression containing  
 761 interaction terms for both *shep* and *Nrg*. The African strain used in the cross is given next to the  
 762 name of each locus. Coefficients represents the log-odds ratio for the specific effect/term. A  
 763 discussion of the difference in these models and models without interaction terms is found in the  
 764 Supplemental Information.  
 765

| <b><i>shep</i> – Z53</b> |                     |                 |
|--------------------------|---------------------|-----------------|
| Effect                   | Coefficient         | <i>P</i> -value |
| $\mu$ - baseline         | 0.1001              | 0.752           |
| $\beta_1$ – deficiency   | -0.4748             | 0.259           |
| $\beta_2$ – strain       | 0.4520              | 0.291           |
| $\beta_3$ - interaction  | 0.9905              | 0.109           |
| <b><i>Nrg</i> – Z53</b>  |                     |                 |
| Effect                   | $\beta$ coefficient | <i>P</i> -value |
| $\mu$ - baseline         | -0.3483             | 0.356           |
| $\beta_1$ – deficiency   | 0.1858              | 0.711           |
| $\beta_2$ – strain       | 0.2877              | 0.575           |
| $\beta_3$ - interaction  | 0.9395              | 0.187           |
| <b><i>Nrg</i> – Z30</b>  |                     |                 |
| Effect                   | $\beta$ coefficient | <i>P</i> -value |
| $\mu$ - baseline         | -0.3483             | 0.356           |
| $\beta_1$ – deficiency   | 0.185               | 0.711           |
| $\beta_2$ – strain       | 0.936               | 0.086           |
| $\beta_3$ - interaction  | 0.864               | 0.255           |

766  
 767



768 **Table 4.** The behavioral differences in female mate preference for both *shep* and *Nrg* using  
769 alternative models that compare each genotype to the random mating expectation. The  
770 coefficients represent log odds ratios, estimated from logistic regression, describing the increase  
771 or decrease in a genotypes propensity to mate with Z53 males. For this analysis we estimated  
772 95% confidence intervals, and those that do not contain 0 are in bold.  
773

| <i>shep</i>          |               |               |
|----------------------|---------------|---------------|
| Strain-Genotype      | Lower 95% CI  | Upper 95% CI  |
| DGRP882 heterozygote | -0.5222       | 0.7289        |
| DGRP882 hemizygote   | -0.9300       | 0.1623        |
| Z53 heterozygote     | -0.0018       | 1.1347        |
| Z53 hemizygote       | <b>0.4141</b> | <b>1.7988</b> |
|                      |               |               |
| <i>Nrg</i>           |               |               |
| Strain-Genotype      | Lower 95% CI  | Upper 95% CI  |
| DGRP882 heterozygote | -1.1117       | 0.3833        |
| DGRP882 hemizygote   | -0.8204       | 0.4840        |
| Z30 heterozygote     | -0.1662       | 1.3996        |
| Z30 hemizygote       | <b>0.8901</b> | <b>2.5349</b> |
| Z53 heterozygote     | -0.7523       | 0.6263        |
| Z53 hemizygote       | <b>0.3800</b> | <b>1.8343</b> |

774

775

776

777

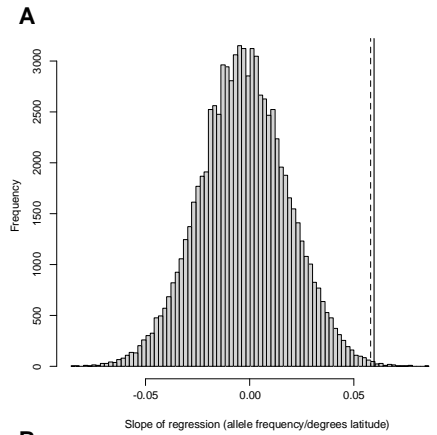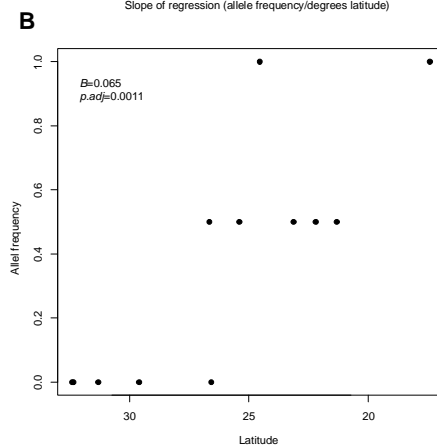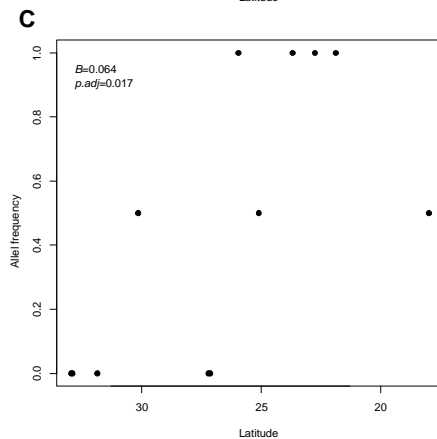

778

779 **Figure 1.** A). The genes *alan shepard* (*shep*) and *Neuroglian* (*Nrg*) are genomic outliers with a  
780 stronger relationship in African allele frequency and latitude in an analysis using genomes from  
781 populations collected in the Southeastern United States and the Bahamas (data previously  
782 collected in Kao et al 2015). The dashed line corresponds to the value for *shep* and the solid line  
783 corresponds to the value for *Nrg*. The change in allele frequency over latitude for B) *Nrg* and C)  
784 *shep*. The regression coefficient and adjusted p-value are provided for each gene.  
785

786

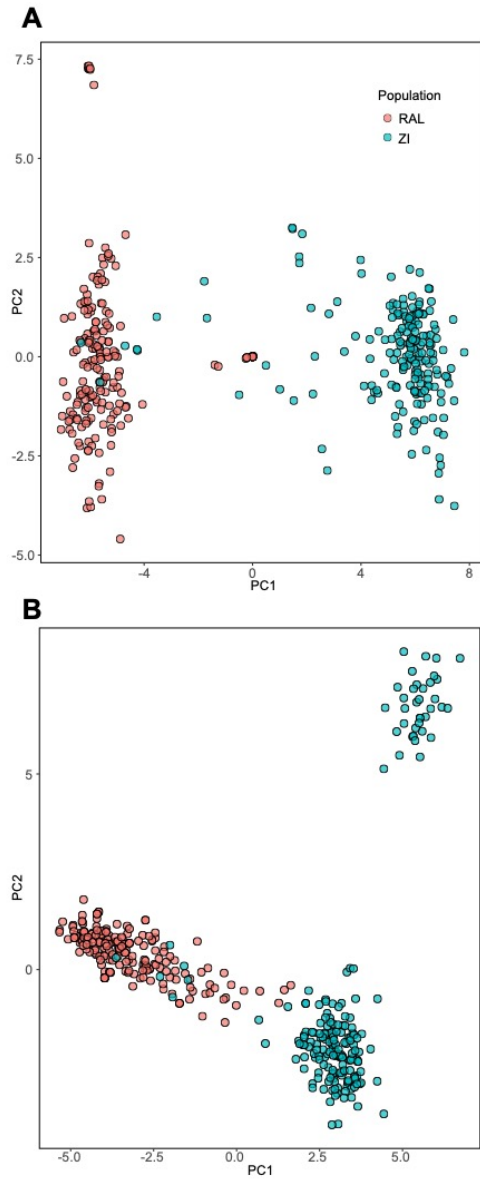

787

788 **Figure 2.** Population differentiation for both A) *shep* and B) *Nrg* are seen in principal  
789 components for allelic variation comparing populations from Raleigh NC (RAL, red) and  
790 Zimbabwe (ZI, blue).

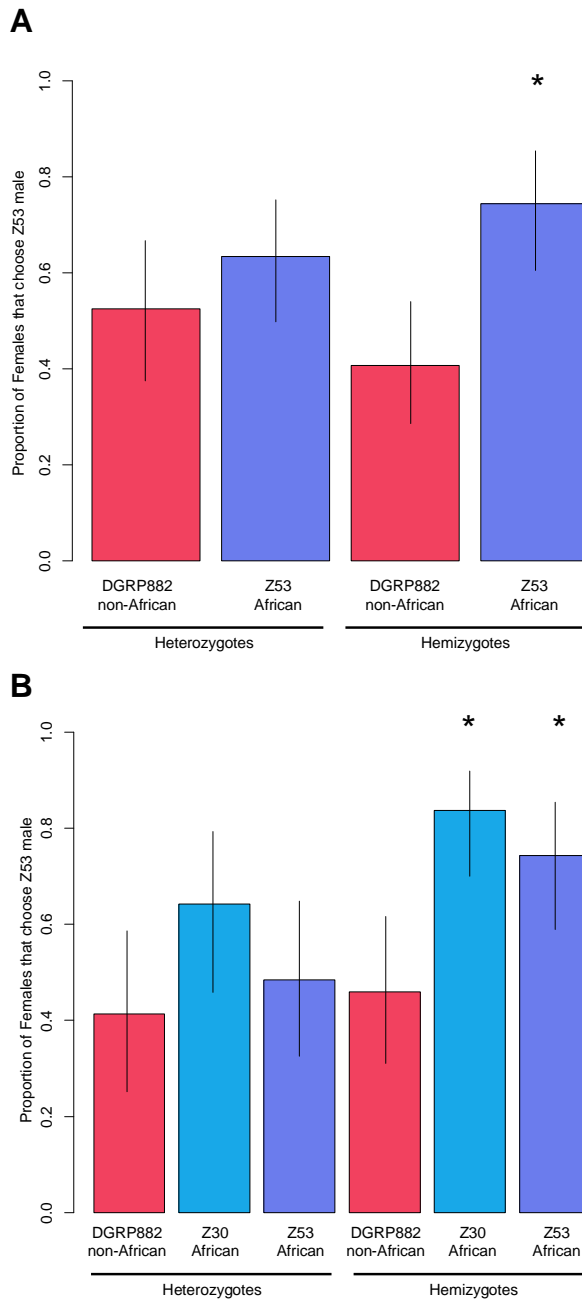

791

792 **Figure 3.** A) *alan shepard* (*shep*) and B) *Neuroglial* (*Nrg*) contribute to African female mate  
793 preference. Female flies that are hemizygous and carry only the African allele of *shep* and *Nrg*  
794 show increased preference for African males compared to heterozygote genotypes. This increase  
795 is in the direction of the wild-type African females. \* represents a significant difference of the  
796 hemizygote genotype from the corresponding heterozygote genotype using a Walds test.  
797 Confidence intervals for each genotype are Wilson rank intervals estimated from the data.

798

799
